# Supplementary material for: Characterisation of PVL-Positive Staphylococcus argenteus from the United Arab Emirates
Source: MDPI journal article supplement (doi:10.3390/antibiotics13050401), 2024-04-27
Supplement: s1 [file s1]

**Supplemental File 3:** Gene content of PVL phages in isolates Dubai-25 and Dubai-30 (FRWRD=Forward, RVRCO=Reverse complement).

| Gene ID            | Gene Product/Description                                                          | Locus tag in NC_055048                  | Start in Dubai-25 | End in Dubai-25 | Orientation in Dubai-25 | Start in Dubai-30 | End in Dubai-30 | Orientation in Dubai-30 |
|--------------------|-----------------------------------------------------------------------------------|-----------------------------------------|-------------------|-----------------|-------------------------|-------------------|-----------------|-------------------------|
| int-1              | integrase                                                                         | KMD47_gp01                              | 1299793           | 1300998         | RVRCO                   | 1586371           | 1587576         | FRWRD                   |
| N/A                | hypothetical protein associated with phage integrase                              | Present but not annotated               | 1300997           | 1301127         | FRWRD                   | 1586242           | 1586372         | RVRCO                   |
| phi-dut            | Na/K ATPase                                                                       | KMD47_gp02                              | 1301124           | 1301738         | FRWRD                   | 1585631           | 1586245         | RVRCO                   |
| N/A                | hypothetical protein, phi-3A-ORF130                                               | Present but not annotated               | 1301735           | 1301860         | RVRCO                   | 1585509           | 1585634         | FRWRD                   |
| phi-D2N8G3         | hypothetical protein                                                              | KMD47_gp03<br><i>plus</i><br>KMD47_gp04 | 1302111           | 1302695         | RVRCO                   | 1584674           | 1585258         | FRWRD                   |
| DUF0955            | metallo-protease                                                                  | KMD47_gp05                              | 1302712           | 1303170         | RVRCO                   | 1584199           | 1584657         | FRWRD                   |
| N/A                | hypothetical protein                                                              | KMD47_gp06                              | 1303192           | 1303668         | RVRCO                   | 1583701           | 1584177         | FRWRD                   |
| DUF0739            | DUF739 family protein                                                             | KMD47_gp07                              | 1303710           | 1303958         | FRWRD                   | 1583411           | 1583659         | RVRCO                   |
| ant                | anti-repressor Ant                                                                | KMD47_gp08                              | 1303976           | 1304419         | FRWRD                   | 1582950           | 1583393         | RVRCO                   |
| N/A                | hypothetical protein                                                              | KMD47_gp09                              | 1304434           | 1304577         | FRWRD                   | 1582792           | 1582935         | RVRCO                   |
| N/A                | hypothetical protein                                                              | KMD47_gp10                              | 1304567           | 1304785         | RVRCO                   | 1582584           | 1582802         | FRWRD                   |
| N/A                | transcriptional regulator                                                         | KMD47_gp11                              | 1304820           | 1305077         | FRWRD                   | 1582292           | 1582549         | RVRCO                   |
| Q9B0H0             | hypothetical protein                                                              | KMD47_gp12                              | 1305046           | 1305411         | RVRCO                   | 1581958           | 1582323         | FRWRD                   |
| N/A                | hypothetical protein                                                              | KMD47_gp13                              | 1305466           | 1305603         | FRWRD                   | 1581766           | 1581903         | RVRCO                   |
| dbp                | DNA binding protein                                                               | KMD47_gp14                              | 1305697           | 1305969         | FRWRD                   | 1581400           | 1581672         | RVRCO                   |
| DUF1270            | DUF1270 domain-containing protein                                                 | KMD47_gp15                              | 1305981           | 1306142         | FRWRD                   | 1581227           | 1581388         | RVRCO                   |
| N/A                | transcriptional regulator                                                         | KMD47_gp16                              | 1306221           | 1306544         | FRWRD                   | 1580825           | 1581148         | RVRCO                   |
| N/A                | hypothetical protein                                                              | KMD47_gp17                              | 1306559           | 1306921         | FRWRD                   | 1580448           | 1580810         | RVRCO                   |
| Q4ZCH8=DUF2800     | DUF2800 domain-containing protein, nuclease superfamily protein from Siphoviridae | KMD47_gp18                              | 1306918           | 1308084         | FRWRD                   | 1579285           | 1580451         | RVRCO                   |
| DUF2815            | Gp2.5-like ssDNA binding protein and ssDNA annealing protein                      | KMD47_gp19                              | 1308065           | 1308667         | FRWRD                   | 1578702           | 1579304         | RVRCO                   |
| pol_phi12/phi2638A | DNA polymerase                                                                    | KMD47_gp20                              | 1308726           | 1310687         | FRWRD                   | 1576682           | 1578643         | RVRCO                   |
| DUF3113            | DUF3113 family protein                                                            | KMD47_gp21                              | 1310700           | 1310885         | FRWRD                   | 1576484           | 1576669         | RVRCO                   |
| dbp                | putative DNA-binding/PVL-phage ORF50-like protein                                 | KMD47_gp22                              | 1310882           | 1311286         | FRWRD                   | 1576083           | 1576487         | RVRCO                   |
| DUF3310            | nucleotide kinase                                                                 | KMD47_gp23                              | 1311286           | 1311543         | FRWRD                   | 1575826           | 1576083         | RVRCO                   |

| Gene ID         | Gene Product/Description                                                 | Locus tag in NC_055048    | Start in Dubai-25 | End in Dubai-25 | Orientation in Dubai-25 | Start in Dubai-30 | End in Dubai-30 | Orientation in Dubai-30 |
|-----------------|--------------------------------------------------------------------------|---------------------------|-------------------|-----------------|-------------------------|-------------------|-----------------|-------------------------|
| N/A             | hypothetical protein, MW1421                                             | KMD47_gp24                | 1311531           | 1311746         | FRWRD                   | 1575623           | 1575838         | RVRCO                   |
| DUF1270         | virulence associated protein                                             | KMD47_gp25                | 1311740           | 1312003         | FRWRD                   | 1575366           | 1575629         | RVRCO                   |
| DUF1024         | DUF1024 family protein                                                   | KMD47_gp26                | 1312009           | 1312272         | FRWRD                   | 1575097           | 1575360         | RVRCO                   |
| N/A             | hypothetical protein                                                     | KMD47_gp27                | 1312241           | 1312429         | FRWRD                   | 1574940           | 1575128         | RVRCO                   |
| dut             | dUTP pyrophosphatase, replication module of Siphoviridae                 | KMD47_gp28                | 1312422           | 1312949         | FRWRD                   | 1574420           | 1574947         | RVRCO                   |
| N/A             | hypothetical protein                                                     | KMD47_gp29                | 1312986           | 1313159         | FRWRD                   | 1574210           | 1574383         | RVRCO                   |
| DUF1381         | transcriptional regulator                                                | KMD47_gp30                | 1313176           | 1313382         | FRWRD                   | 1576484           | 1576669         | RVRCO                   |
| N/A             | hypothetical protein                                                     | KMD47_gp31                | 1313370           | 1313573         | FRWRD                   | 1573796           | 1573999         | RVRCO                   |
| N/A             | hypothetical protein                                                     | KMD47_gp32                | 1313570           | 1313722         | FRWRD                   | 1573647           | 1573799         | RVRCO                   |
| rinB            | RinB-like transcriptional activator                                      | KMD47_gp33                | 1313688           | 1313867         | FRWRD                   | 1573502           | 1573681         | RVRCO                   |
| Q4ZCN3=DUF1514  | hypothetical protein                                                     | KMD47_gp34                | 1313902           | 1314135         | FRWRD                   | 1573234           | 1573467         | RVRCO                   |
| virE            | DNA helicase                                                             | KMD47_gp35                | 1314187           | 1316634         | FRWRD                   | 1570735           | 1573182         | RVRCO                   |
| N/A             | hypothetical protein, ST42eORF147                                        | Present but not annotated | 1316658           | 1316780         | RVRCO                   | 1570589           | 1570711         | FRWRD                   |
| N/A             | hypothetical protein                                                     | KMD47_gp36                | 1316697           | 1316801         | FRWRD                   | 1570568           | 1570672         | RVRCO                   |
| N/A             | hypothetical protein, UG86_01560                                         | Present but not annotated | 1316743           | 1316832         | RVRCO                   | 1570537           | 1570626         | FRWRD                   |
| nuc_Q4ZCF7      | endonuclease                                                             | KMD47_gp37                | 1316915           | 1317265         | FRWRD                   | 1570104           | 1570454         | RVRCO                   |
| dhlC-1          | DNA helicase                                                             | KMD47_gp38                | 1317246           | 1318613         | FRWRD                   | 1568756           | 1570123         | RVRCO                   |
| rinA=Q4ZCF5     | transcriptional regulator                                                | KMD47_gp39                | 1318626           | 1319063         | FRWRD                   | 1568306           | 1568743         | RVRCO                   |
| N/A             | hypothetical protein                                                     | KMD47_gp40                | 1319108           | 1319233         | FRWRD                   | 1568136           | 1568261         | RVRCO                   |
| nuc-HNH         | HNH endonuclease                                                         | KMD47_gp41                | 1319220           | 1319534         | FRWRD                   | 1567835           | 1568149         | RVRCO                   |
| terS            | terminase small subunit                                                  | KMD47_gp42                | 1319643           | 1319966         | FRWRD                   | 1567403           | 1567726         | RVRCO                   |
| terL            | terminase large subunit                                                  | KMD47_gp43                | 1319947           | 1321647         | FRWRD                   | 1565722           | 1567422         | RVRCO                   |
| por             | portal protein                                                           | KMD47_gp44                | 1321652           | 1322890         | FRWRD                   | 1564479           | 1565717         | RVRCO                   |
| clpP=Q5HIZ6=pro | Clp-protease/"head maturation protein", packaging module of Siphoviridae | KMD47_gp45                | 1322862           | 1323647         | FRWRD                   | 1563722           | 1564507         | RVRCO                   |
| macp=mcp        | major capsid protein                                                     | KMD47_gp46                | 1323614           | 1324822         | FRWRD                   | 1562547           | 1563755         | RVRCO                   |

| Gene ID        | Gene Product/Description                                         | Locus tag in NC_055048    | Start in Dubai-25 | End in Dubai-25 | Orientation in Dubai-25 | Start in Dubai-30 | End in Dubai-30 | Orientation in Dubai-30 |
|----------------|------------------------------------------------------------------|---------------------------|-------------------|-----------------|-------------------------|-------------------|-----------------|-------------------------|
| N/A            | hypothetical protein, ST42eORF172                                | Present but not annotated | 1324770           | 1324880         | FRWRD                   | 1562489           | 1562599         | RVRCO                   |
| htcp           | head-tail adaptor Ad1                                            | KMD47_gp47                | 1324891           | 1325169         | FRWRD                   | 1562200           | 1562478         | RVRCO                   |
| N/A            | hypothetical protein                                             | KMD47_gp48                | 1325181           | 1325513         | FRWRD                   | 1561856           | 1562188         | RVRCO                   |
| N/A            | hypothetical protein, SAR1513, SACOL0373                         | Present but not annotated | 1325540           | 1325911         | FRWRD                   | 1561458           | 1561829         | RVRCO                   |
| DUF3168        | DUF3168 domain-containing protein                                | KMD47_gp49                | 1325912           | 1326307         | FRWRD                   | 1561062           | 1561457         | RVRCO                   |
| matp1 =mtp     | tail protein                                                     | KMD47_gp50                | 1326342           | 1326983         | FRWRD                   | 1560386           | 1561027         | RVRCO                   |
| matp           | major tail protein                                               | KMD47_gp51                | 1327075           | 1327530         | FRWRD                   | 1559839           | 1560294         | RVRCO                   |
| N/A            | putative protein, tail module of Siphoviridae                    | KMD47_gp52                | 1327588           | 1327929         | FRWRD                   | 1559440           | 1559781         | RVRCO                   |
| N/A            | hypothetical protein                                             | KMD47_gp53                | 1327980           | 1328138         | FRWRD                   | 1559231           | 1559389         | RVRCO                   |
| tmpM           | tail length tape measure protein                                 | KMD47_gp54                | 1328152           | 1334352         | FRWRD                   | 1553018           | 1559217         | RVRCO                   |
| holA=Q4ZCS6    | putative bacteriophagal tail protein/holin                       | KMD47_gp55                | 1334352           | 1335176         | FRWRD                   | 1552194           | 1553018         | RVRCO                   |
| sitp=Q8SDP1    | tail protein with endopeptidase domain                           | KMD47_gp56                | 1335185           | 1336768         | FRWRD                   | 1550602           | 1552185         | RVRCO                   |
| N/A            | hypothetical protein                                             | KMD47_gp57                | 1336768           | 1337058         | FRWRD                   | 1550312           | 1550602         | RVRCO                   |
| mitp1          | minor tail protein                                               | KMD47_gp58                | 1337074           | 1338984         | FRWRD                   | 1548386           | 1550296         | RVRCO                   |
| bppU=DUF2479   | BppU family baseplate upper protein                              | KMD47_gp59                | 1338984           | 1340450         | FRWRD                   | 1546920           | 1548236         | RVRCO                   |
| mitp2=DUF2977  | tail fiber protein                                               | KMD47_gp60                | 1340450           | 1340839         | FRWRD                   | 1546531           | 1546920         | RVRCO                   |
| N/A            | tail fiber protein                                               | KMD47_gp61                | 1340832           | 1340996         | FRWRD                   | 1546374           | 1546538         | RVRCO                   |
| DUF2951=Q9MBN6 | DUF2951 domain-containing protein                                | KMD47_gp62                | 1341021           | 1341341         | FRWRD                   | 1546029           | 1546349         | RVRCO                   |
| holA-1         | holin, lysis module of Siphoviridae                              | KMD47_gp63                | 1341432           | 1341779         | FRWRD                   | 1545591           | 1545938         | RVRCO                   |
| ami            | N-acetylmuramoyl-L-alanine amidase, lysis module of Siphoviridae | KMD47_gp64                | 1341790           | 1343244         | FRWRD                   | 1544126           | 1545580         | RVRCO                   |
| O80065         | hypothetical protein accompanying PVL genes                      | KMD47_gp65                | 1343394           | 1343526         | FRWRD                   | 1543844           | 1543976         | RVRCO                   |
| lukS-PV        | Panton-Valentine leukocidin, S component                         | KMD47_gp66                | 1343625           | 1344572         | FRWRD                   | 1542798           | 1543745         | RVRCO                   |
| lukF-PV        | Panton-Valentine leukocidin, F component                         | KMD47_gp67                | 1344574           | 1345551         | FRWRD                   | 1541819           | 1542796         | RVRCO                   |
