# Supplementary material for: Characterisation of PVL-Positive Staphylococcus argenteus from the United Arab Emirates
Source: MDPI journal article supplement (doi:10.3390/antibiotics13050401), 2024-04-27
Supplement: s1 [file s1]

**Supplemental File 4:** Gene content of the other prophages in isolates Dubai-25 and Dubai-30 and comparison to a *sufB*-integrating prophage from another CC<sub>arg</sub>2250 strain, XNO62 CP023076.1

[illegible]

|                                       | Dubai-25<br>[sufB-integr prophage] |          | Dubai-30<br>[sufB-integr prophage] |          | Dubai-25<br>[A5IU43-integr prophage] |          | CP023076.1:847404-893404<br>[sufB-integr prophage] |          |
|---------------------------------------|------------------------------------|----------|------------------------------------|----------|--------------------------------------|----------|----------------------------------------------------|----------|
|                                       | Start pos.                         | End pos. | Start pos.                         | End pos. | Start pos.                           | End pos. | Start pos.                                         | End pos. |
| SARLGA251_07830                       |                                    |          |                                    |          |                                      |          | 853021                                             | 853267   |
| phi-Q931J5                            | 863769                             | 863963   | 863794                             | 863988   | 2022005                              | 2022199  |                                                    |          |
| phi-treG_CA347_1950                   | 864786                             | 865007   | 864811                             | 865032   |                                      |          | 853337                                             | 853559   |
| phi-treG_ST42eORF072                  |                                    |          |                                    |          | 2021388                              | 2021606  |                                                    |          |
| phi-DUF1270_SAS063                    | 865000                             | 865161   | 865025                             | 865186   | 2021234                              | 2021395  |                                                    |          |
| hypothet. phage protein ROSA-ORF193   | 865020                             | 865130   | 865045                             | 865155   |                                      |          | 853571                                             | 853682   |
| phi-DUF1108_                          | 865253                             | 865513   | 865278                             | 865538   |                                      |          | 853804                                             | 854065   |
| phi-AAA-ATPase                        |                                    |          |                                    |          |                                      |          | 854558                                             | 855332   |
| NW943_03595                           |                                    |          |                                    |          |                                      |          | 856675                                             | 857335   |
| phi-Q4ZAK4_rep                        |                                    |          |                                    |          |                                      |          | 857380                                             | 858151   |
| phi-DUF2483_SACOL0337                 | 865523                             | 865744   | 865548                             | 865769   | 2020652                              | 2020873  |                                                    |          |
| phi-ssaP_DUF1071                      | 865737                             | 866360   | 865762                             | 866385   | 2020036                              | 2020659  |                                                    |          |
| phi-ssbP_C9J86_00295                  | 866360                             | 866788   | 866385                             | 866813   | 2019608                              | 2020036  |                                                    |          |
| phi-DUF0968_SACOL0340                 |                                    |          |                                    |          | 2018899                              | 2019594  |                                                    |          |
| phi-DUF0968_Sipho-0780to83_SAOV_1954c | 867470                             | 868249   | 867495                             | 868274   |                                      |          |                                                    |          |
| phi-Q4ZAY9_SaO11_01748                | 868257                             | 869024   | 868282                             | 869049   |                                      |          |                                                    |          |
| phi-Q4ZAY9_SACOL0341                  |                                    |          |                                    |          | 2018109                              | 2018927  |                                                    |          |
| phi-dbp_SACOL0342                     |                                    |          |                                    |          | 2017753                              | 2018109  |                                                    |          |
| phi-dnaC=istB1_SaO11_01747            | 869034                             | 869807   | 869059                             | 869832   |                                      |          | 858160                                             | 858934   |
| phi-sri                               | 869801                             | 869959   | 869826                             | 869984   |                                      |          | 858927                                             | 859086   |
| phi-DUF3269_SACOL0345                 | 869972                             | 870193   | 869997                             | 870218   |                                      |          | 859098                                             | 859320   |
| phi-DUF1064_SAOV_1947c                | 870203                             | 870607   | 870228                             | 870632   |                                      |          | 859329                                             | 859734   |
| phi-dhIC-2a_SACOL0343                 |                                    |          |                                    |          | 2016515                              | 2017756  |                                                    |          |
| hypothet. phage protein SACOL0344     |                                    |          |                                    |          | 2016303                              | 2016518  |                                                    |          |
| phi-DUF3113_SACOL0348                 | 870612                             | 870797   | 870637                             | 870822   |                                      |          |                                                    |          |

|                                  | Dubai-25<br>[sufB-integr prophage] |          | Dubai-30<br>[sufB-integr prophage] |          | Dubai-25<br>[A5IU43-integr prophage] |          | CP023076.1:847404-893404<br>[sufB-integr prophage] |          |
|----------------------------------|------------------------------------|----------|------------------------------------|----------|--------------------------------------|----------|----------------------------------------------------|----------|
|                                  | Start pos.                         | End pos. | Start pos.                         | End pos. | Start pos.                           | End pos. | Start pos.                                         | End pos. |
| phi-DUF3113_MW1424               |                                    |          |                                    |          | 2016079                              | 2016300  |                                                    |          |
| phi-DUF1064_SACOL0347            |                                    |          |                                    |          | 2015664                              | 2016068  |                                                    |          |
| phi-dbp_MW1917                   | 870798                             | 871160   | 870823                             | 871185   | 2015108                              | 2015470  | 859927                                             | 860287   |
| phi-DUF1270_ST0131_02112         | 871245                             | 871409   | 871270                             | 871434   | 2014859                              | 2015023  | 860368                                             | 860533   |
| phi_gnaT_SAA6159_01912           | 871457                             | 871789   | 871482                             | 871814   |                                      |          |                                                    |          |
| phi-DUF1024_Sipho                | 871782                             | 872024   | 871807                             | 872049   | 2014356                              | 2014844  | 860547                                             | 860796   |
| hypothet. phage protein MW1418   |                                    |          |                                    |          |                                      |          | 860788                                             | 860962   |
| hypothet. phage protein MW1417   |                                    |          |                                    |          |                                      |          | 860962                                             | 861244   |
| hypothet. phage protein MW1416   |                                    |          |                                    |          |                                      |          | 861244                                             | 861406   |
| phi-dut_SaO11_00288              |                                    |          |                                    |          |                                      |          | 861555                                             | 861948   |
| phi-dut_SACOL0357                | 872259                             | 872768   | 872284                             | 872793   |                                      |          |                                                    |          |
| phi-dut_SAOV_1092                |                                    |          |                                    |          | 2013821                              | 2014363  |                                                    |          |
| phi-DUF1381_KMD47_gp30           |                                    |          |                                    |          |                                      |          | 861984                                             | 862191   |
| hypothet. phage protein MW1412   |                                    |          |                                    |          | 2013421                              | 2013621  |                                                    |          |
| hypothet. phage protein SAB1731c | 872805                             | 873050   | 872830                             | 873075   |                                      |          |                                                    |          |
| phi-pol_NW963_09520              | 873308                             | 873544   | 873333                             | 873569   |                                      |          |                                                    |          |
| phi-DUF1523_SAKOR_01952          | 873537                             | 873923   | 873562                             | 873948   |                                      |          |                                                    |          |
| phi-DUF1381_CU118_04855          |                                    |          |                                    |          | 2013596                              | 2013784  |                                                    |          |
| phi-rinB_SATW20_03570            | 873920                             | 874093   | 873945                             | 874118   | 2013245                              | 2013418  |                                                    |          |
| phi-rinM                         | 874097                             | 874240   | 874122                             | 874265   | 2013098                              | 2013241  | 862364                                             | 862508   |
| phi-rinA                         | 874255                             | 874674   | 874280                             | 874699   | 2012652                              | 2013074  | 862522                                             | 862942   |
| phi-terS_MS7_0616                | 874861                             | 875301   | 874886                             | 875326   | 2012025                              | 2012465  | 863128                                             | 863569   |
| phi-terL_MS7_0617                | 875288                             | 876565   | 875313                             | 876590   | 2010761                              | 2012038  |                                                    |          |
| phi-terL                         |                                    |          |                                    |          |                                      |          | 863555                                             | 864833   |
| phi-port_A4ZFA8                  | 876576                             | 878111   | 876601                             | 878136   | 2009215                              | 2010750  | 864843                                             | 866382   |
| phi-micp/hmp_SAB1724c            | 878232                             | 879113   | 878257                             | 879138   | 2008213                              | 2009094  | 866502                                             | 867384   |

|                                           | Dubai-25<br>[sufB-integr prophage] |          | Dubai-30<br>[sufB-integr prophage] |          | Dubai-25<br>[A5IU43-integr prophage] |          | CP023076.1:847404-893404<br>[sufB-integr prophage] |          |
|-------------------------------------------|------------------------------------|----------|------------------------------------|----------|--------------------------------------|----------|----------------------------------------------------|----------|
|                                           | Start pos.                         | End pos. | Start pos.                         | End pos. | Start pos.                           | End pos. | Start pos.                                         | End pos. |
| hypothet. phage protein<br>NCTC5663_00903 | 879186                             | 879356   | 879211                             | 879381   |                                      |          | 867456                                             | 867627   |
| phi-DUF4355_scaf_SAB1723c                 | 879491                             | 880105   | 879516                             | 880130   |                                      |          | 867761                                             | 868376   |
| phi-DUF4355_scaf_phi-69-ORF022            |                                    |          |                                    |          | 2007232                              | 2007852  |                                                    |          |
| phi-macp_phi-69-ORF011                    | 880119                             | 881093   | 880144                             | 881118   | 2006244                              | 2007218  | 868389                                             | 869364   |
| hypothet. phage protein SAB1721c          | 881115                             | 881402   | 881140                             | 881427   | 2005935                              | 2006222  | 869385                                             | 869673   |
| phi-htcp_SAB1720c                         |                                    |          | 881436                             | 881768   |                                      |          | 869681                                             | 870014   |
| phi-htcp                                  | 881411                             | 881743   |                                    |          | 2005594                              | 2005926  |                                                    |          |
| hypothet. phage protein SAB1719c          | 881740                             | 882042   | 881765                             | 882067   |                                      |          | 870010                                             | 870313   |
| phi-tail                                  | 882042                             | 882389   | 882067                             | 882414   | 2004948                              | 2005295  | 870312                                             | 870660   |
| phi-matp_MS7_0627                         |                                    |          | 882828                             | 883409   |                                      |          | 871073                                             | 871655   |
| hypothet. phage protein                   |                                    |          | 882967                             | 883071   |                                      |          | 871212                                             | 871317   |
| hypothet. phage protein SAB1717c          | 882401                             | 882784   |                                    |          | 2004553                              | 2004936  | 870671                                             | 871055   |
| phi-DUF3647_tmchap_KI244_01915            | 883447                             | 883812   |                                    |          | 2003525                              | 2003890  |                                                    |          |
| hypothet. phage protein SAB1714c          | 883842                             | 884186   | 883866                             | 884210   | 2003151                              | 2003495  | 872111                                             | 872456   |
| phi-tmpM5_ML435_08605                     | 884203                             | 887667   | 884227                             | 887691   | 1999667                              | 2003134  | 872472                                             | 875937   |
| phi-stp                                   | 887680                             | 888627   | 887704                             | 888651   | 1998707                              | 1999654  | 875949                                             | 876897   |
| hypothet. phage protein                   |                                    |          | 890419                             | 890583   |                                      |          | 878664                                             | 878829   |
| phi-mitp1                                 |                                    |          | 890576                             | 892486   |                                      |          | 878821                                             | 880732   |
| phi-Q2FX67=pep_SAB1711c                   |                                    |          | 888660                             | 890561   |                                      |          |                                                    |          |
| phi-Q2FX67=pep_SAOUHSC_02030              | 888636                             | 890537   |                                    |          | 1996797                              | 1998698  | 876905                                             | 878807   |
| hypothet. phage protein<br>NCTC5663_00917 | 890552                             | 892462   |                                    |          |                                      |          |                                                    |          |
| hypothet. phage protein<br>SAOV_1958c     |                                    |          |                                    |          | 1994872                              | 1996782  | 854079                                             | 854559   |
| phi-bppU/mitp2                            | 892462                             | 894285   | 892486                             | 894309   | 1993049                              | 1994872  | 880731                                             | 882555   |
| phi-mitp2=DUF2977_CA347_1906              | 894285                             | 894662   | 894309                             | 894686   | 1992672                              | 1993049  | 882554                                             | 882932   |

[illegible]
